# Supplementary material for: Forward Genetic Analysis to Identify Determinants of Dopamine Signaling in Caenorhabditis elegans Using Swimming-Induced Paralysis
Source: PubMed Central journal article supplement (PMC3411251; doi:10.1534/g3.112.003533), 2012-08-01
Supplement: supp_2.8.961_FigureS6.pdf [file supp_2.8.961_FigureS6.pdf]

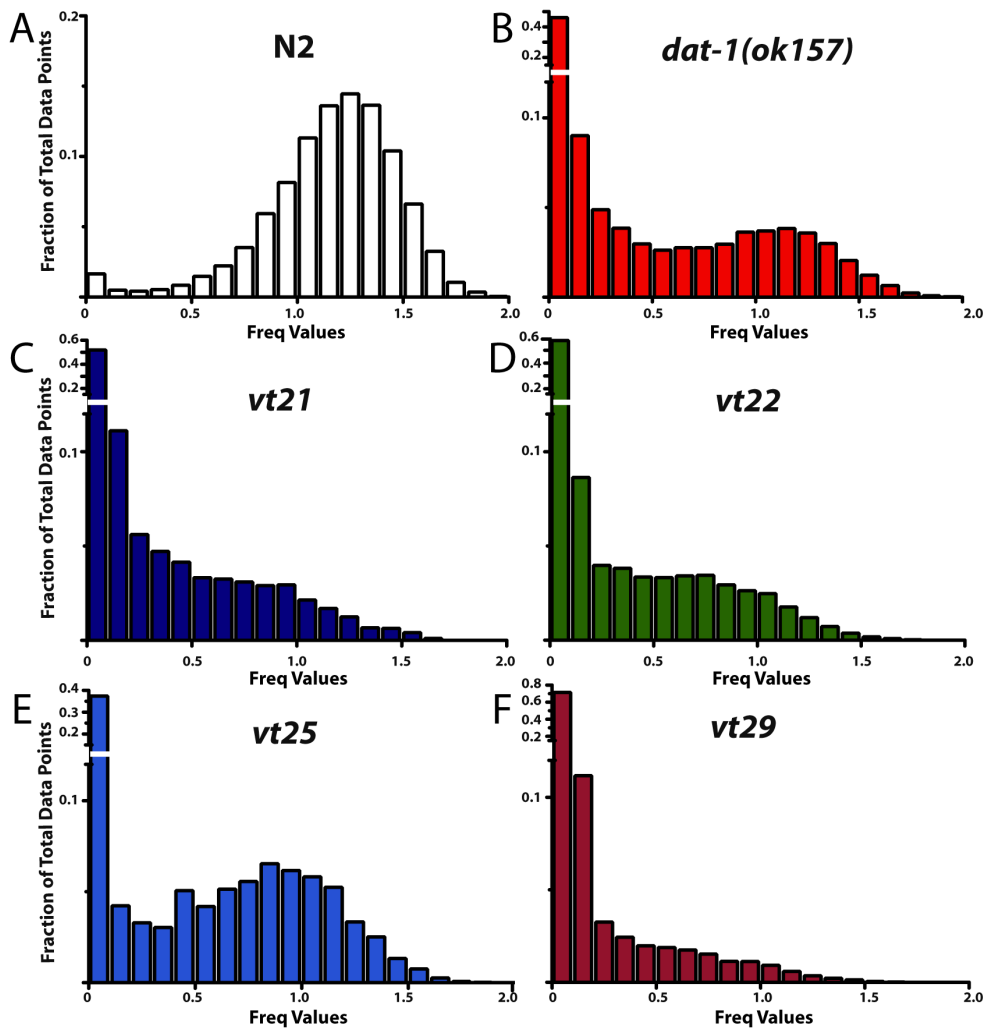

**Figure S6** Histogram of automated thrashing behavior in N2, *dat-1(ok157)* and *swip* lines generated by SwimR software. For all plots (A-F), the total # of data points for all animals within a genotype were grouped into successive 0.1 Hz bins and plotted as the fraction of the total # of data points. In the *swip* mutants (C-F), the y-axis and first column are broken in order to visualize the patterns of lower frequency bins.
